# Supplementary material for: Methane distribution and oxidation around the Lena Delta in summer 2013
Source: Copernicus journal article supplement (doi:10.5194/bg-14-4985-2017), 2017-11-08
Supplement: Supplementary file 1 [file bg-14-4985-2017-supplement.zip]

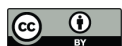

## *Supplement of*

# **Methane distribution and oxidation around the Lena Delta in summer 2013**

**Ingeborg Bussmann et al.**

*Correspondence to:* Ingeborg Bussmann ([ingeborg.bussmann@awi.de](mailto:ingeborg.bussmann@awi.de))

- [bg-14-4985-2017-supplement-title-page.pdf](#)
- [suppl\\_figure.pptx](#)

The copyright of individual parts of the supplement might differ from the CC BY 3.0 License.
